# Supplementary material for: Observations of precipitation energies during different types of pulsating aurora
Source: Copernicus journal article supplement (doi:10.5194/angeo-38-1191-2020), 2020-11-13
Supplement: Supplementary file 1 [file angeo-38-1191-2020-supplement.zip]

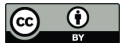

## *Supplement of*

# **Observations of precipitation energies during different types of pulsating aurora**

**Fasil Tesema et al.**

*Correspondence to:* Fasil Tesema (fasil.tesema@unis.no)

- angeo-38-1191-2020-supplement-title-page.pdf
- \_\_MACOSX
  - .\_supplement\_movies
  - supplement\_movies
    - \* .\_DS\_Store
    - \* .\_20140124\_APA.avi
    - \* .\_20140124\_PPA\_to\_PA.avi
    - \* .\_Supplement document.docx
- supplement\_movies
  - .DS\_Store
  - 20140124\_APA.avi
  - 20140124\_PPA\_to\_PA.avi
  - Supplement document.docx

The copyright of individual parts of the supplement might differ from the CC BY 4.0 License.
