# Supplementary material for: Observations of precipitation energies during different types of pulsating aurora
Source: Copernicus journal article supplement (doi:10.5194/angeo-38-1191-2020), 2020-11-13
Supplement: Supplementary file 1 [file Supplement document.docx]

Supplement for

**Observations of precipitation energies during different types of pulsating aurora**Fasil Tesema, Noora Partamies, Hilde Nesse Tyssøy, and Derek McKay

---------------------------------------------------------------------------------------------

Sample movie in categorizing pulsating aurora (PsA) into amorphous (APA), patchy (PA) and patchy pulsating (PPA).

The first movie (20140124_APA) is for amorphous PsA and the second one (20140124_PPA_to_PA) contains both patchy pulsating and patchy aurora.

The two dots on the movies are the location of EISCAT (red) and the location of the ASC at KIL (cyan). The green time stamp is in UT hours.
